# Supplementary material
Source: PubMed Central journal article supplement (PMC3993587)
Supplement: MCB.01394-13_zmb999100383so1.pdf [file MCB.01394-13_zmb999100383so1.pdf]

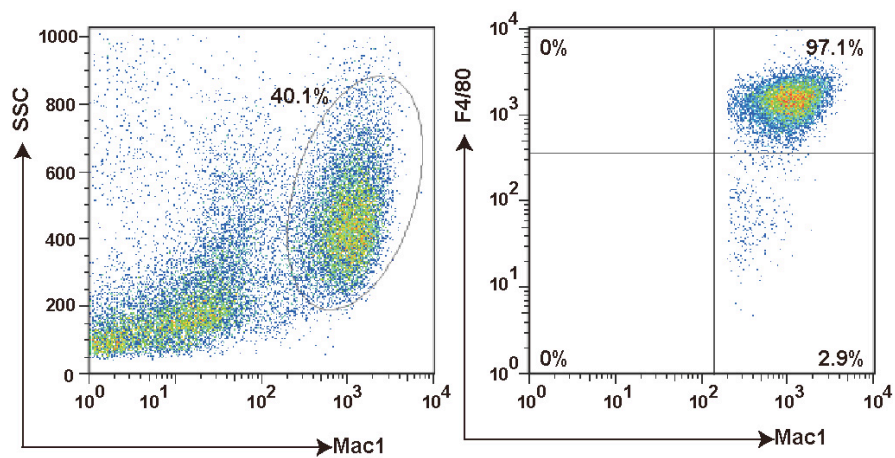

**Supplementary Figure 1.** Expression of Mac1 and F4/80 in rpMacs. Peritoneal cells from C57BL/6J mice were stained with APC-conjugated anti-mouse Mac1 mAb, and biotinylated anti-F4/80 mAb, followed by staining with Alexa488-conjugated streptavidin, and analyzed by flow cytometry. Left panel shows the staining profile for Mac1. In right panel, the Mac1-positive cells enclosed in left panel are analyzed for Mac1 and F4/80.

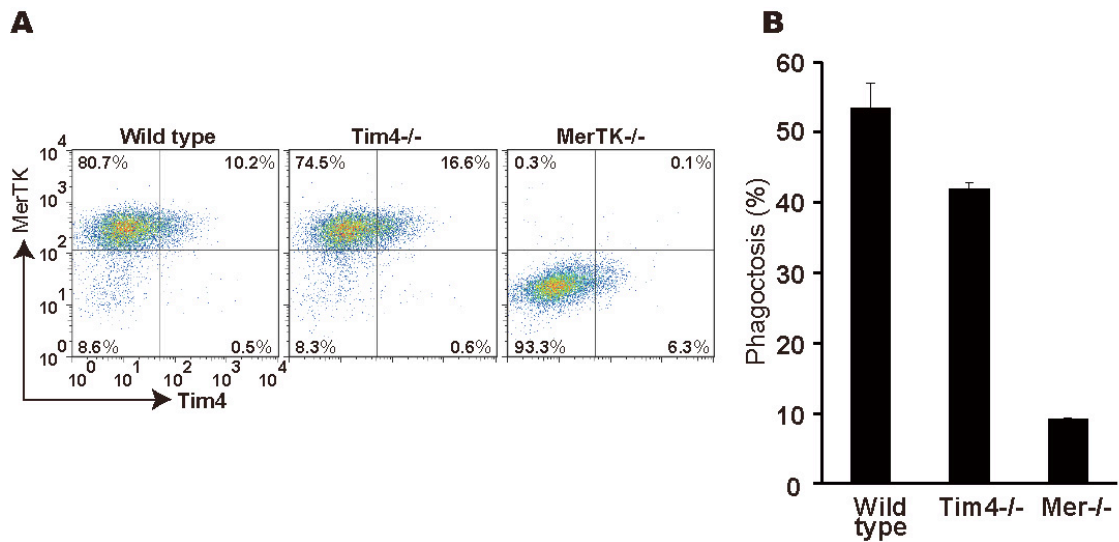

**Supplementary Figure 2.** Requirement of MerTK for the engulfment of apoptotic cells by mouse thioglycollate-elicited peritoneal macrophages. (A) The thioglycollate-elicited peritoneal macrophages (thio-pMacs) were prepared from the wild-type, *Tim4*<sup>-/-</sup> and *MerTK*<sup>-/-</sup> mice as described previously (Hanayama et al., 2002), and cultured in DMEM containing 10%FCS. Cells were stained with PerCP-Cy5.5-anti-mouse Mac1, biotinylated goat anti-MerTK, and hamster anti-mouse Tim4, followed by staining with Alexa488-streptavidin and APC-anti-hamster IgG. The stained cells were analyzed by flow cytometry. The expression profiles of MerTK and Tim4 in the Mac1-positive population are shown. (B) The thio-pMacs from wild-type, *Tim4*<sup>-/-</sup>, and *MerTK*<sup>-/-</sup> mice were incubated with pHrodo-labeled apoptotic thymocytes at 37°C for 120 min and the percentage of pHrodo-positive cells in Mac1-positive population was determined by flow cytometry. The experiments were performed three times, and the average values are plotted with the S.D. (bars).

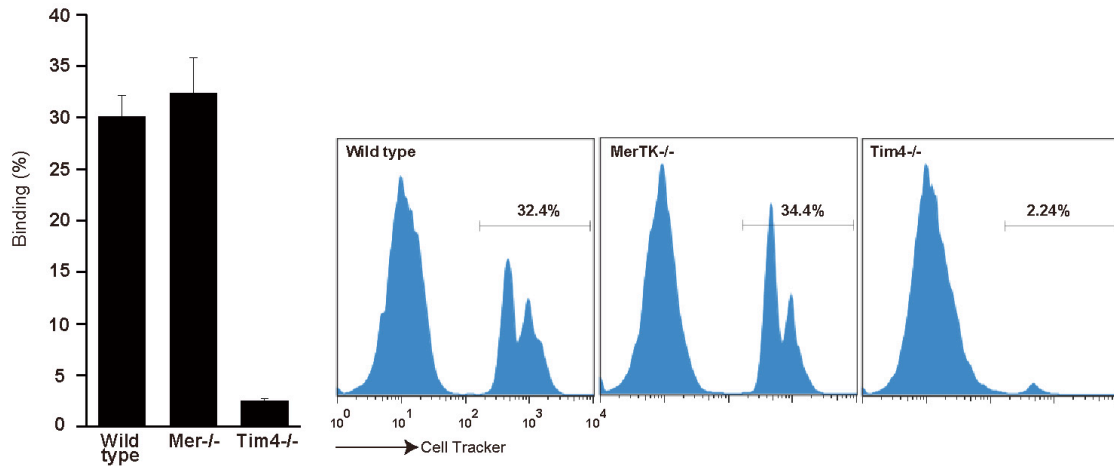

**Supplementary Figure 3.** Thymocytes from 4 week old C57BL/6J mice were labeled with CellTracker Orange at 37°C for 30 min, and incubated with FasL in serum free DMEM at 37°C for 2 h to induce apoptosis. The cells were washed with PBS containing 0.5% BSA and 0.25% globulin, and suspended in PBS containing 0.5% BSA. Peritoneal cells from wild-type, *Tim4*<sup>-/-</sup> and *Mer*<sup>-/-</sup> mice were incubated with CellTracker-labeled cells at 37°C for 30 min, and analyzed by flow cytometry for the CellTracker-positive cells in Mac1-positive population. The number indicates the percentage of CellTracker-positive cells. The experiments were done in triplicate, and the average values with S.D. (bars) are plotted. At right, a representative CellTracker-staining profile of Mac1-positive cells is shown.

MerTK<sup>-/-</sup> rpMacs

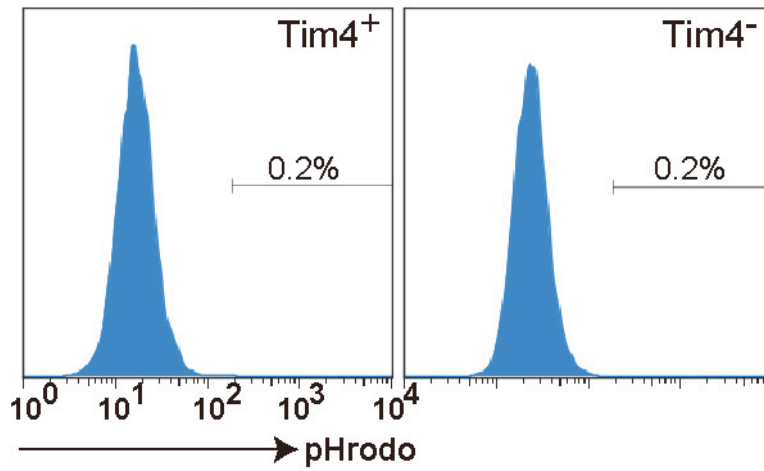

Supplementary Figure 4. No engulfment of apoptotic cells by MerTK<sup>-/-</sup> rpMacs. The rpMacs ( $1 \times 10^5$  cells) from the MerTK<sup>-/-</sup> mice were incubated at 37°C for 60 min with pHrodo-labeled apoptotic thymocytes ( $1 \times 10^6$  cells). The cells were stained with PerCP-Cy5-anti mouse Mac1, hamster anti-Tim4, followed by staining with APC-antihamster IgG, and analyzed by flow cytometry. The FACS profiles for pHrodo-positive cells in each Tim4<sup>+</sup> and Tim4<sup>-</sup> population of Mac1-positive cells are shown. The number indicates the percentage of pHrodo-positive cells in each population.
